# Supplementary material
Source: MDPI journal article supplement (https://www.mdpi.com/2073-4395/12/3/742)
Supplement: s1 [file s1 › agronomy-1589118-supplementary.pdf]

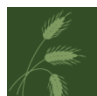

**Table S1.** Growth duration, plant height, and potential yield of both cultivars.

| Name            | Characteristics |                      |                                |                           |
|-----------------|-----------------|----------------------|--------------------------------|---------------------------|
|                 | Type            | Plant Height<br>(cm) | Yield<br>(t ha <sup>-1</sup> ) | Growth Duration<br>(Days) |
| Huiliangyou 898 | Hybrid          | 107.9                | 9.21–9.36                      | 133.6                     |
| Yliangyou 900   | Hybrid          | 119.7                | 9.27–9.40                      | 140.7                     |
